# Supplementary material for: Greenery-inspired nanoengineering of bamboo-like hierarchical porous nanotubes with spatially organized bifunctionalities for synergistic photothermal catalytic CO2 fixation
Source: Royal Society of Chemistry journal article supplement (doi:10.1039/d2ta02885a), 2022-01-01
Supplement: d2ta02885a1.pdf [file d2ta02885a1.pdf]

## Supporting Information

### **Greenery-Inspired Nanoengineering of Bamboo-Like Hierarchical Porous Nanotubes with Spatially Organized Bifunctionalities for Synergistic Photothermal Catalytic CO<sub>2</sub> Fixation**

Yingchun Guo,<sup>a</sup> Weijia Chen,<sup>b</sup> Lei Feng,<sup>b</sup> Yanchen Fan,<sup>c</sup> Jinsheng Liang,<sup>\*a</sup> Xiaomei Wang<sup>\*b</sup> and Xu Zhang<sup>\*b</sup>

<sup>a</sup> Key Laboratory of Special Functional Materials for Ecological Environment and Information, School of Materials Science and Engineering, Hebei University of Technology, Ministry of Education, Tianjin 300130, China

<sup>b</sup> Hebei Key Laboratory of Functional Polymers, School of Chemical Engineering and Technology, Hebei University of Technology, Tianjin 300130, China

<sup>c</sup> School of Materials Science and Engineering, Beihang University, Beijing 100191, China

\*Corresponding Author: E-mail: [xmwang@hebut.edu.cn](mailto:xmwang@hebut.edu.cn); [xuzhang@hebut.edu.cn](mailto:xuzhang@hebut.edu.cn); [liangjinsheng@hebut.edu.cn](mailto:liangjinsheng@hebut.edu.cn)

## Experimental Section

**Chemicals.** All chemicals were purchased from commercial supplies and used without further purification. Nickel nitrate hexahydrate ( $\text{Ni}(\text{NO}_3)_2 \cdot 6\text{H}_2\text{O}$ , 98%), Zinc nitrate hexahydrate ( $\text{Zn}(\text{NO}_3)_2 \cdot 6\text{H}_2\text{O}$ , 98%), 2-methylimidazole (2-MeIM, 99%), 2, 2'-azobis (isobutyronitrile) (AIBN, 99%), and 4-vinylbenzyl chloride (VBC) (99%) were received from Tianjin Fuchen Chemical Corporation. 1-vinyl-3-ethylimidazolium bromide (VEIMBr), anhydrous ferric (III) chloride ( $\text{FeCl}_3$ ), 1, 2-dichloroethane (DCE), divinylbenzene (DVB, containing 80% divinylbenzene isomers), methanol ( $\text{CH}_3\text{OH}$ , 99%), and concentrated sulfuric acid ( $\text{H}_2\text{SO}_4$ , 98 wt%) were obtained from Tianjin Hengshan Chemical Corporation. 3-bromopropylene oxide (99%), 2-butyloxirane (99%), 2-(phenoxy)methyl)oxirane (99%), 2-phenyloxirane (99%), 2-((allyloxy)methyl)oxirane (99%), *p*-aminostyrene (St-NH<sub>2</sub>, 96%) were received from Aladdin. Carbon dioxide and Ar gas were obtained from Tianjin Dongrun Gas Co., Ltd.

**Characterizations.** The morphology and structure were acquired by field-emission scanning electron microscopy with different accelerating voltage (SEM, FEI Nova NanoSEM450) and transmission electron microscopy (TEM, FEI Talos F200S, 200 kV). The aberration-corrected high-angle annular dark-field scanning transmission electron microscopy (AC-HAADF-STEM) measurements were taken on a Titan Themis Cubed G2 60-300, FEI. X-ray diffraction (XRD) patterns were investigated by a Bruker D8-Davinci equipped with Cu K $\alpha$  radiation source. X-ray photoelectron spectroscopy (XPS) measurements were conducted on a Thermo Scientific ESCALab-250Xi spectrometer with monochromatic Al K $\alpha$  radiation, and the binding energies were calibrated using the C 1s peak at 284.6 eV. Nitrogen adsorption-desorption isotherms were acquired on a surface area and porosity analyzer (Micromeritics ASAP 2020). The content of Ni atoms was investigated by an Optima 7300 DV inductively coupled plasma atomic emission spectrometer (ICP-AES). Fourier transform infrared (FT-IR) spectra were performed on a Bruker VECTOR-22 spectrometer. The <sup>1</sup>H-nuclear magnetic resonance (NMR)

spectra were analyzed and identified by a Bruker 400 spectrometer using  $\text{CDCl}_3$  as a solvent and tetramethylsilane (TMS) as an internal standard. Electron paramagnetic resonance (EPR) spectra were collected by a Bruker EMXnano. Raman spectra were recorded on a Renishaw inVia Reflex UV Raman spectrometer with an excitation laser wavelength of  $\lambda = 532$  nm. The obtained liquid solution after reaction was identified by GC-MS, and was quantitatively analyzed by GC equipped with flame ionization detector. Magnetic hysteresis loops of the materials were measured at room temperature via vibrating sample magnetometer (VSM, MPMS XL-7).

**Theoretical calculation details.** All calculations in this work were performed using Gaussian 09 program package. Full geometry optimizations and the energies corrected by zero-point vibrational effects were performed to locate all the stationary points, using DFT/B3LYP/6-311G. The intrinsic reaction coordinate path was traced to check the energy profiles connecting each transition state to two associated minima of the proposed mechanism.

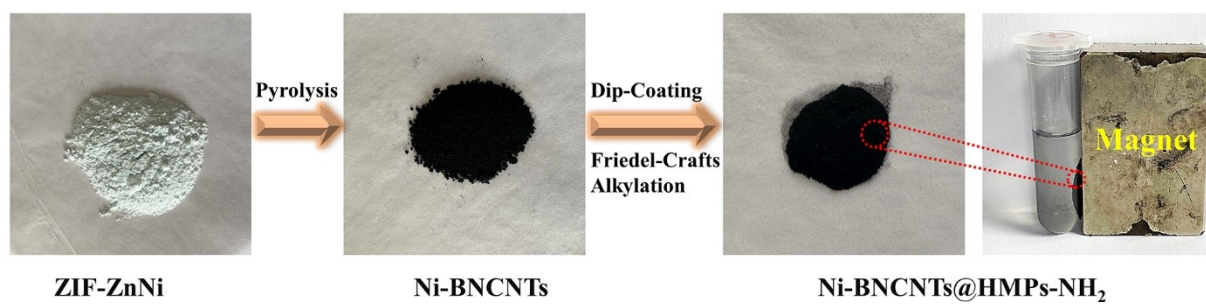

**Figure S1.** Photographs of the detailed fabrication process for the preparation of Ni-BNCNTs@HMPs-NH<sub>2</sub>.

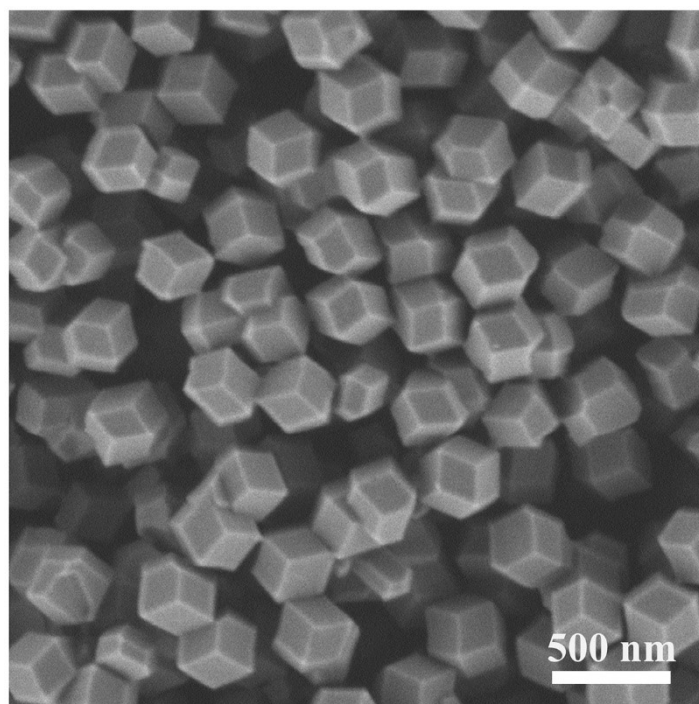

**Figure S2.** SEM image of the ZIF-ZnNi.

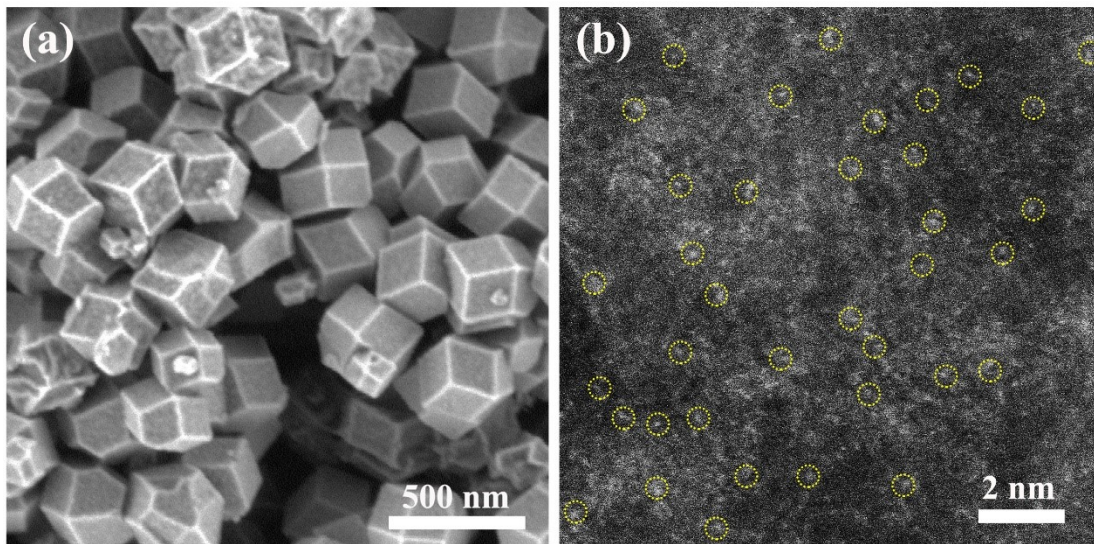

**Figure S3.** (a) SEM image and (b) aberration-corrected HAADF-STEM image of the Ni-RDNC.



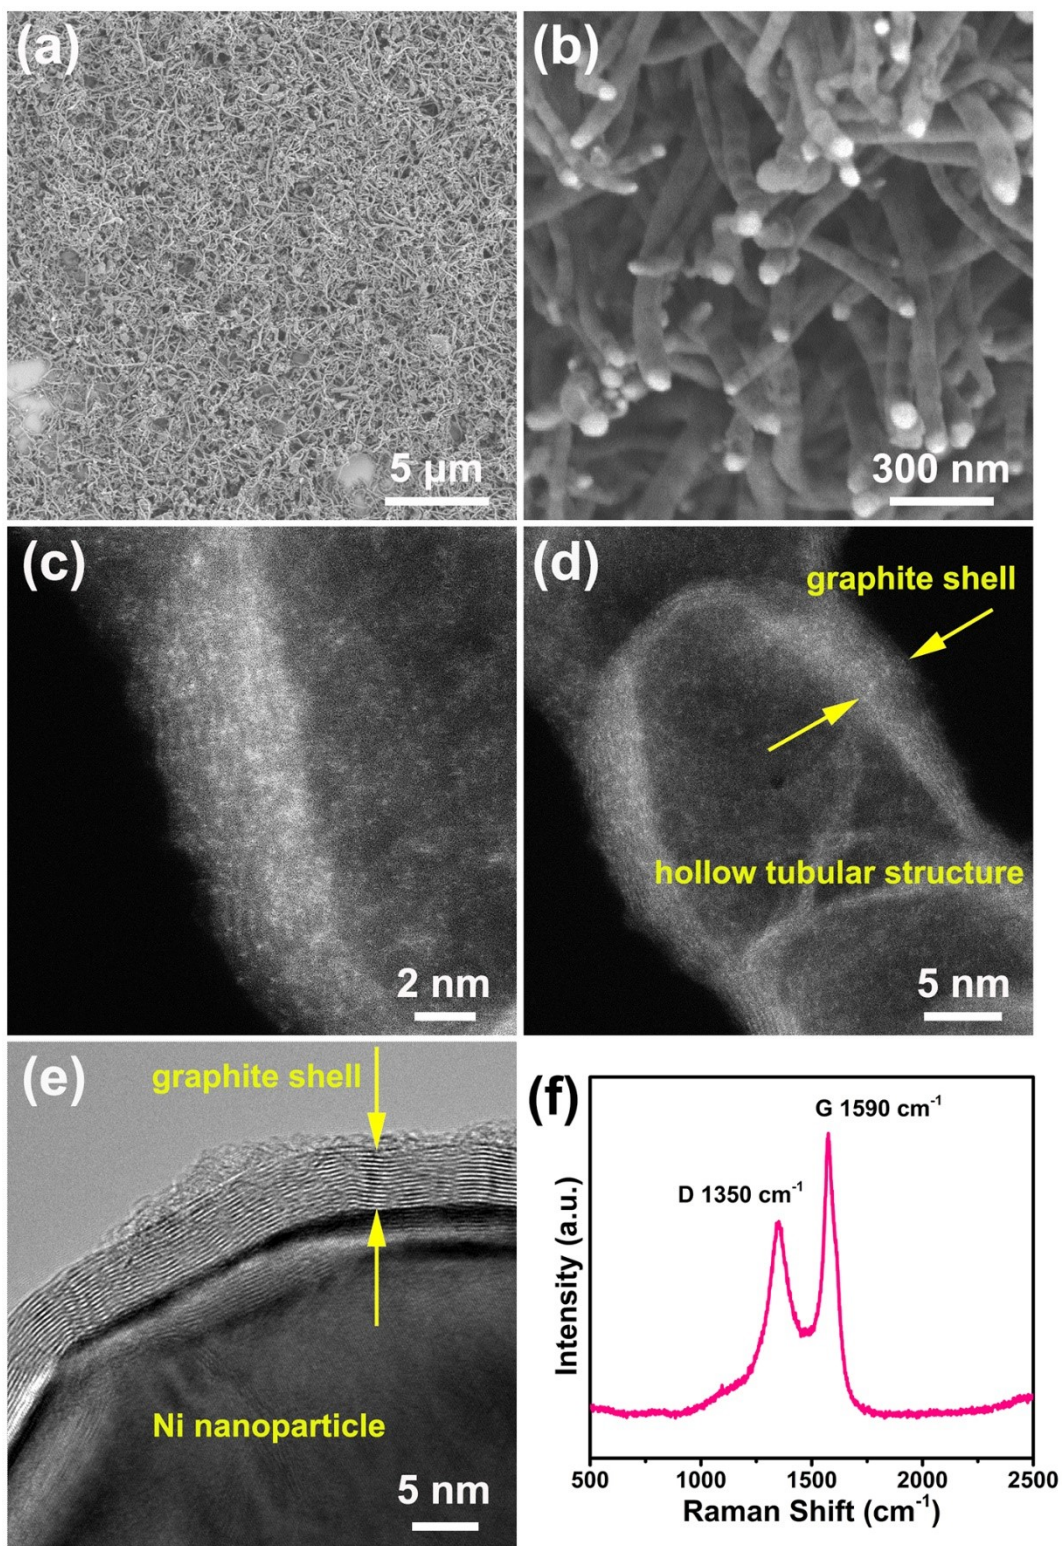

**Figure S4.** (a, b) SEM images, (c, d) aberration-corrected HAADF-STEM images, (e) TEM image, and (f) Raman spectrum of the Ni-BNCNTs.

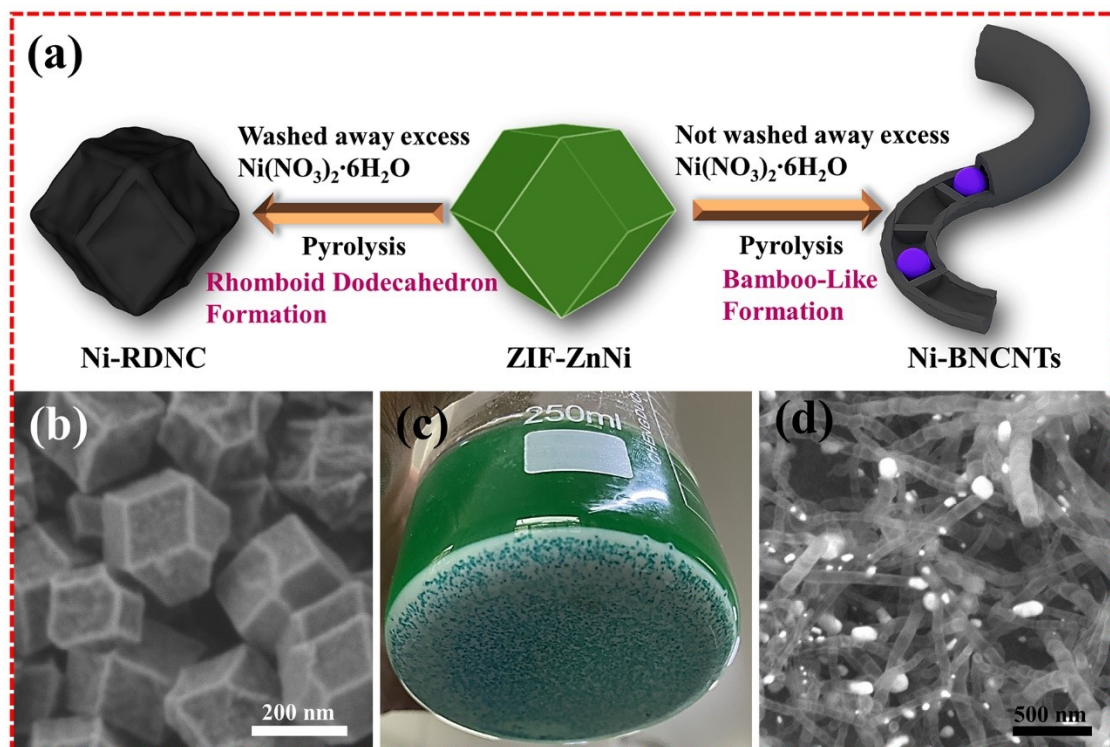

**Figure S5.** (a) Schematic illustration for the synthesis of Ni-RDNC and Ni-BNCNTs, (b) SEM image of Ni-RDNC, (c) Photograph of ZIF-ZnNi methanol solution, (d) SEM image of Ni-BNCNTs.

As shown in **Figure S5**, when the ratio of  $\text{Zn}(\text{NO}_3)_2 \cdot 6\text{H}_2\text{O}$  and  $\text{Ni}(\text{NO}_3)_2 \cdot 6\text{H}_2\text{O}$  is 1, there is a large amount of excess  $\text{Ni}(\text{NO}_3)_2 \cdot 6\text{H}_2\text{O}$  (green granular) at the bottom of the beaker at the end of the reaction in addition to the production of ZIF-ZnNi (white powder). When the  $\text{Ni}(\text{NO}_3)_2 \cdot 6\text{H}_2\text{O}$  was washed away, the rhombic dodecahedral structure remained after pyrolysis (**Figure S5b**), while when the  $\text{Ni}(\text{NO}_3)_2 \cdot 6\text{H}_2\text{O}$  was not washed away, the bamboo-like nanotube structure was formed after pyrolysis (**Figure S5d**).



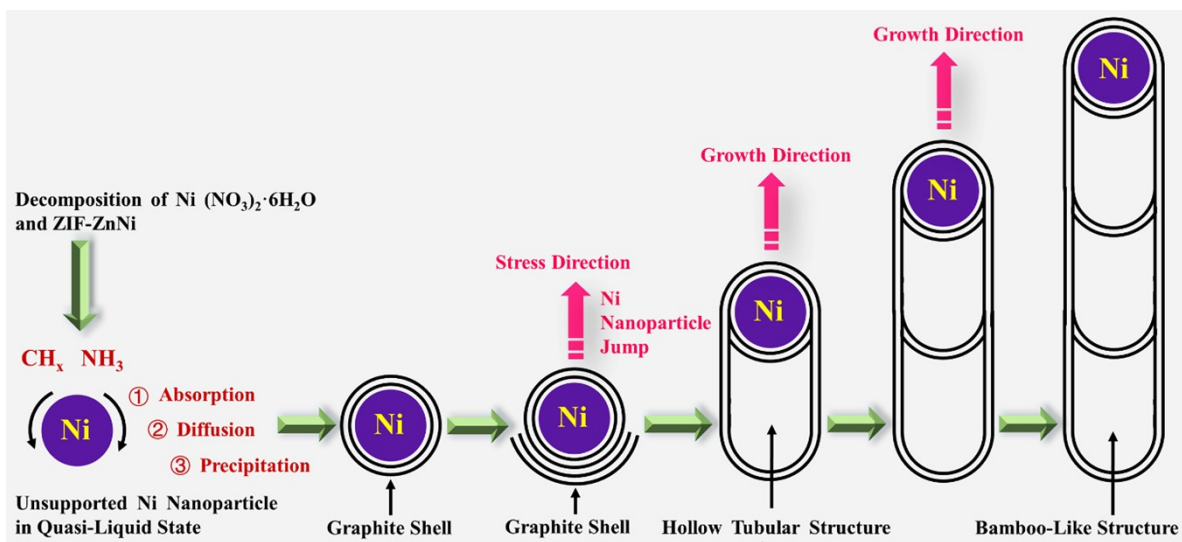

Figure S6. Formation mechanism of bamboo-like carbon nanotubes.

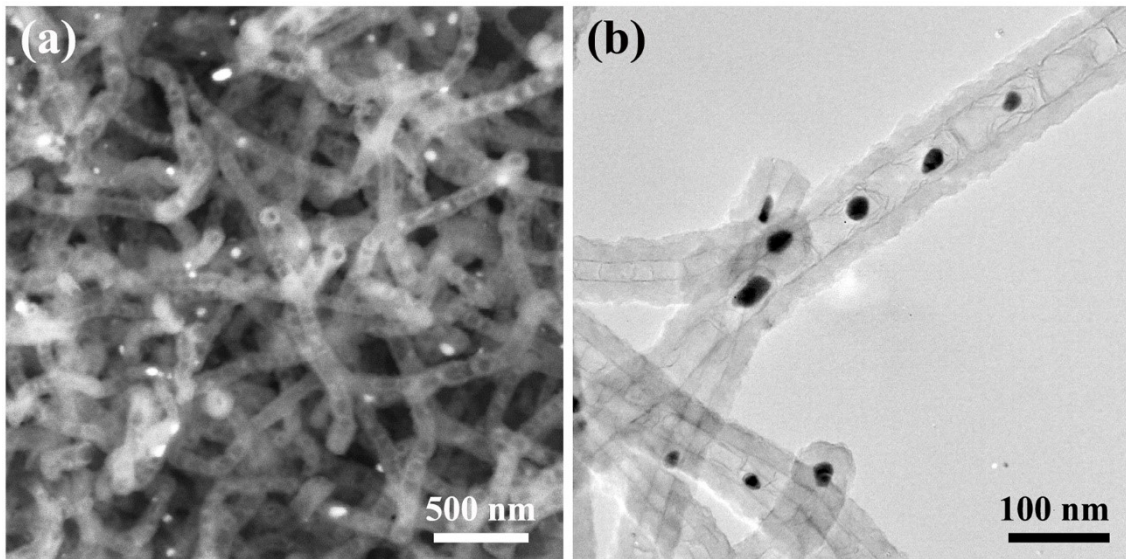

**Figure S7.** (a) SEM image (concentric backscattered retractable detector at 5 kV) and (b) TEM image of the Ni-BNCNTs@HMPs-NH<sub>2</sub>.

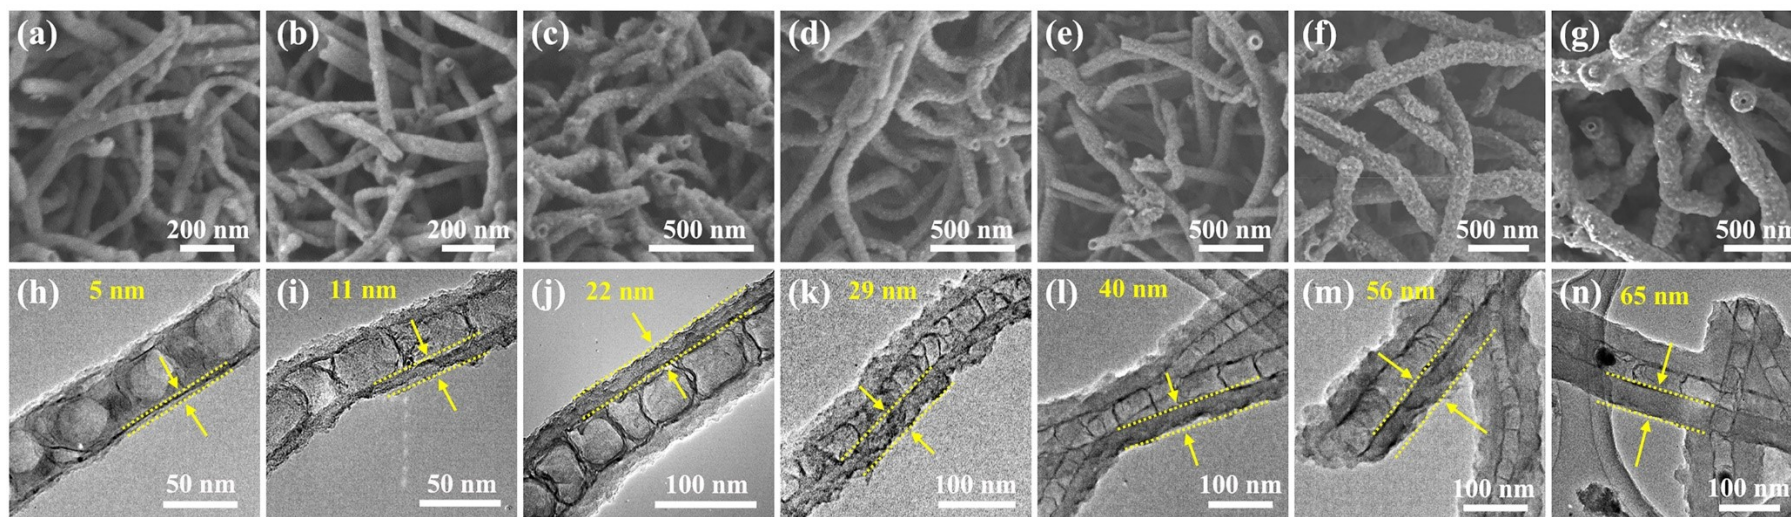

**Figure S8.** (a-g) SEM images and (h-n) TEM images of the Ni-BNCNTs@HMPs-NH<sub>2</sub> with different shell thickness prepared by different concentrations of precursors.

The ratio of ethanol to mixed monomer is (a, h) 1.8 mL/5.0 mmol, (b, i) 1.6 mL/5.0 mmol, (c, j) 1.4 mL/5.0 mmol, (d, k) 1.2 mL/5.0 mmol, (e, l) 1.0 mL/5.0 mmol, (f, m) 0.8 mL/5.0 mmol, and (g, n) 0.6 mL/5.0 mmol.

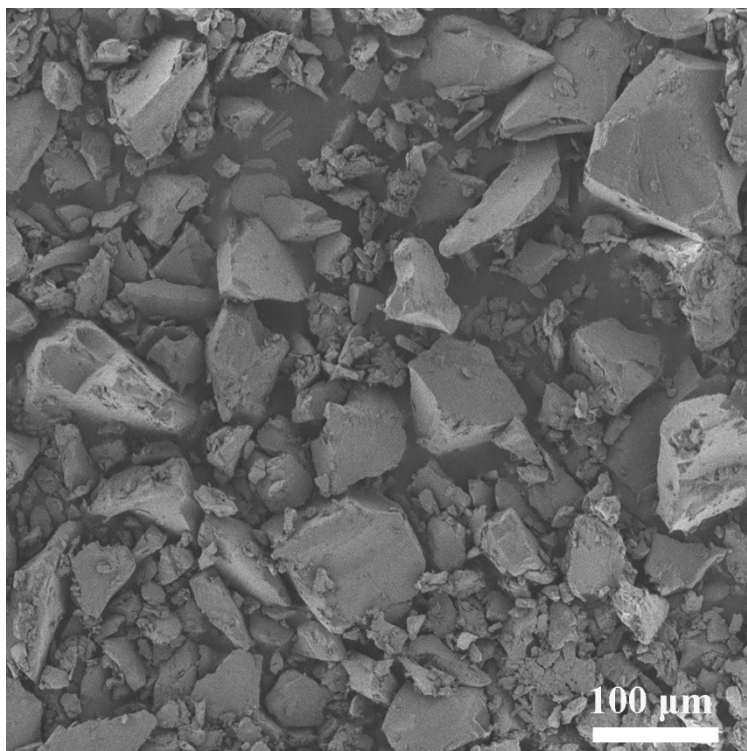

**Figure S9.** SEM image of the HMPs-NH<sub>2</sub>.

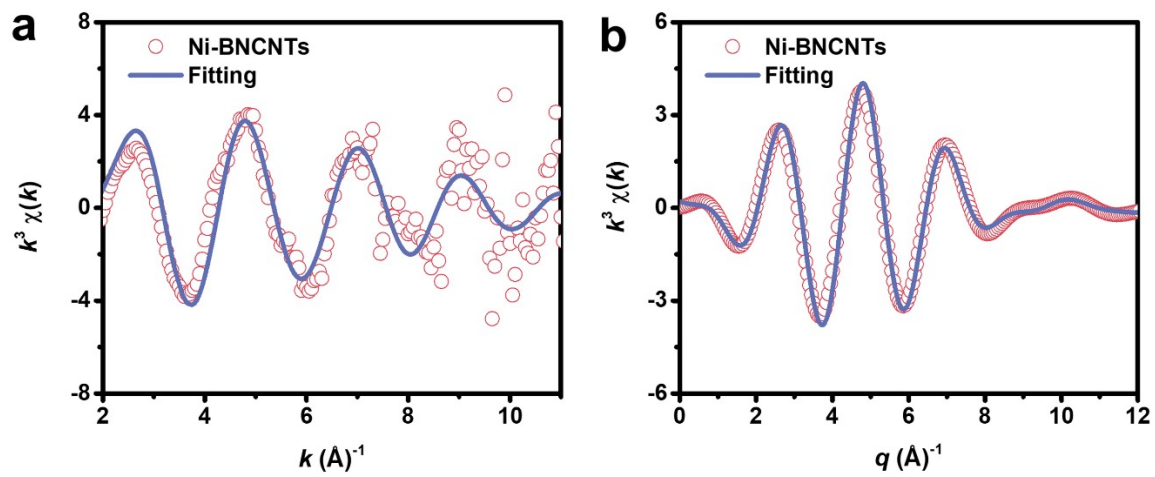

**Figure S10.** The corresponding FT-EXAFS (a) k-space and (b) q-space fitting curves of Ni-BNCNTs.

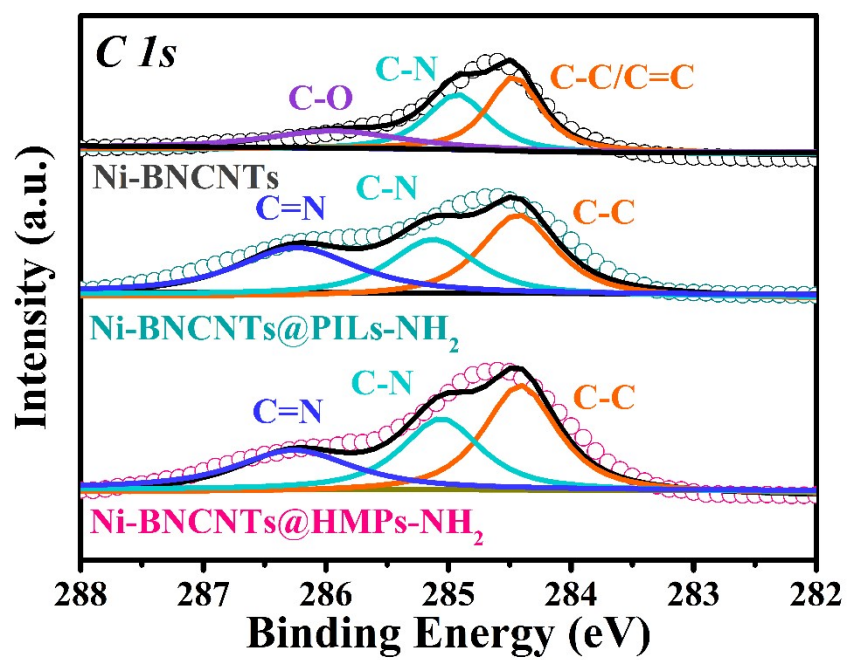

**Figure S11.** High-resolution XPS C 1s spectra of Ni-BNCNTs, Ni-BNCNTs@PILs-NH<sub>2</sub>, and Ni-BNCNTs@HMPs-NH<sub>2</sub>.



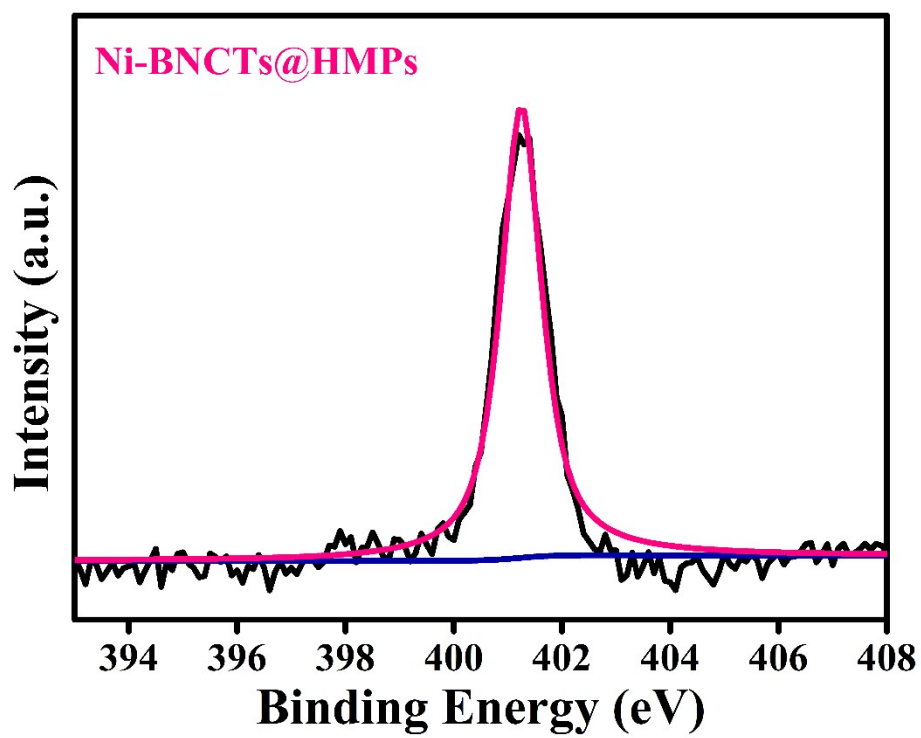

**Figure S12.** The XPS spectrum of high-resolution N 1s for Ni-BNCTs@HMPs.

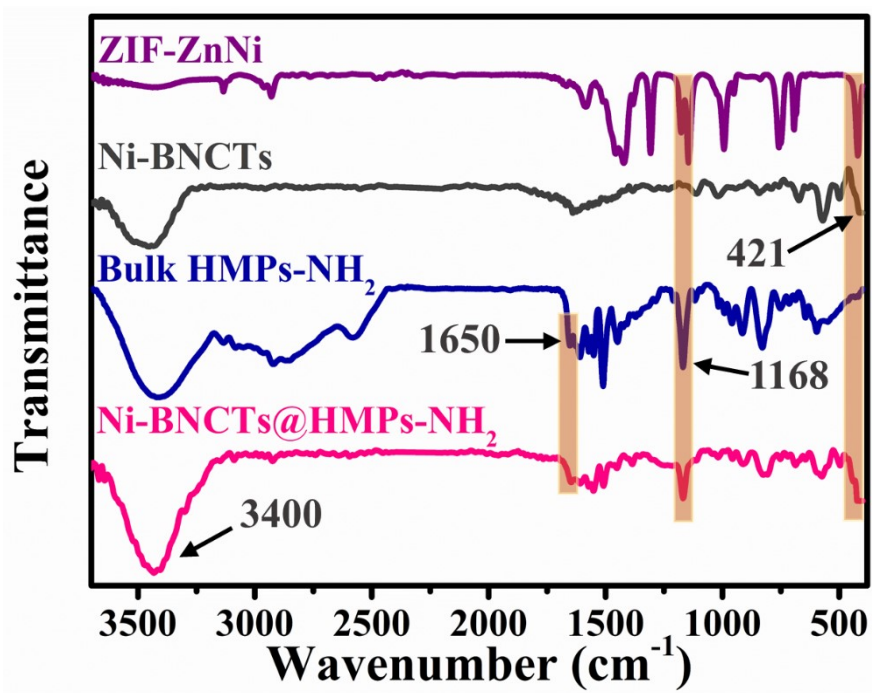

**Figure S13.** (a) FT-IR spectra of ZIF-ZnNi, Ni-BNCTs, HMPs-NH<sub>2</sub>, and Ni-BNCTs@HMPs-NH<sub>2</sub>.

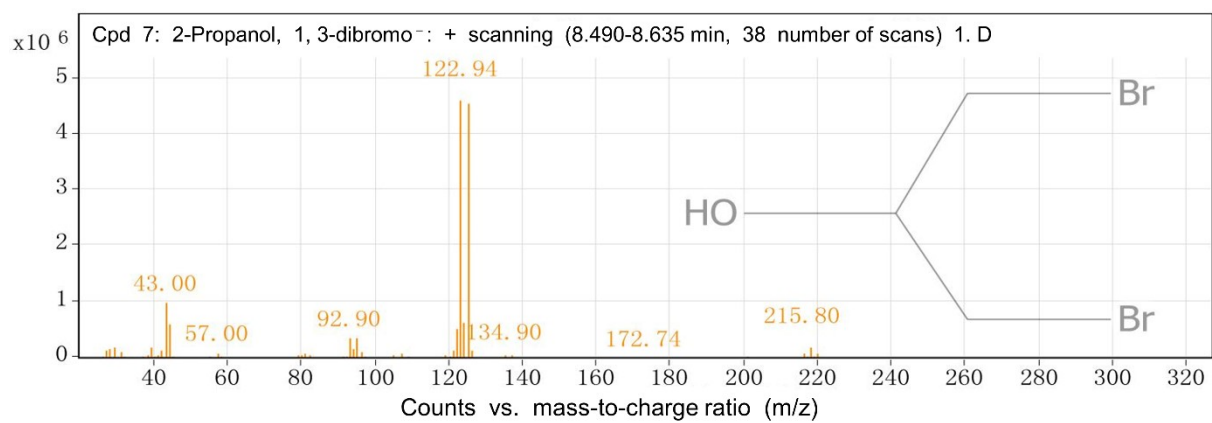

**Figure S14.** The GC-MS spectrum of generated ring-opened intermediate.

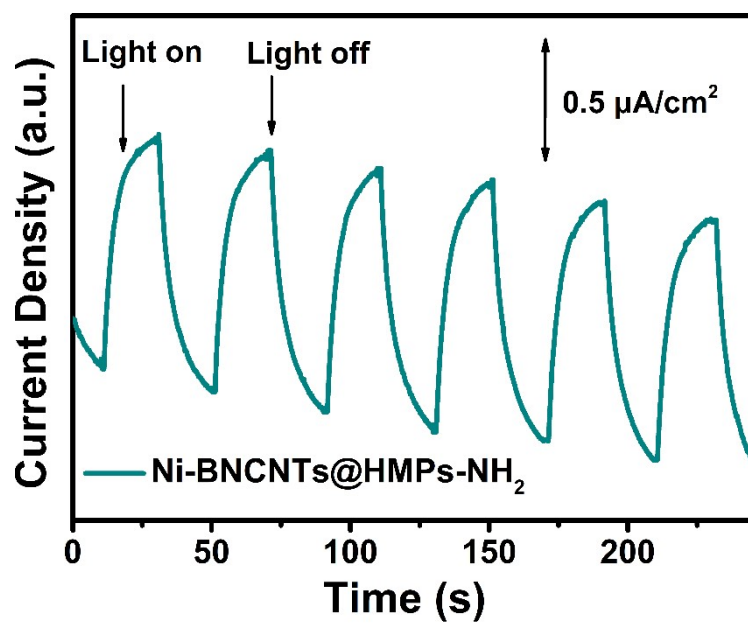

Figure S15. The photocurrent responses of Ni-BNCNTs@HMPs-NH<sub>2</sub>.

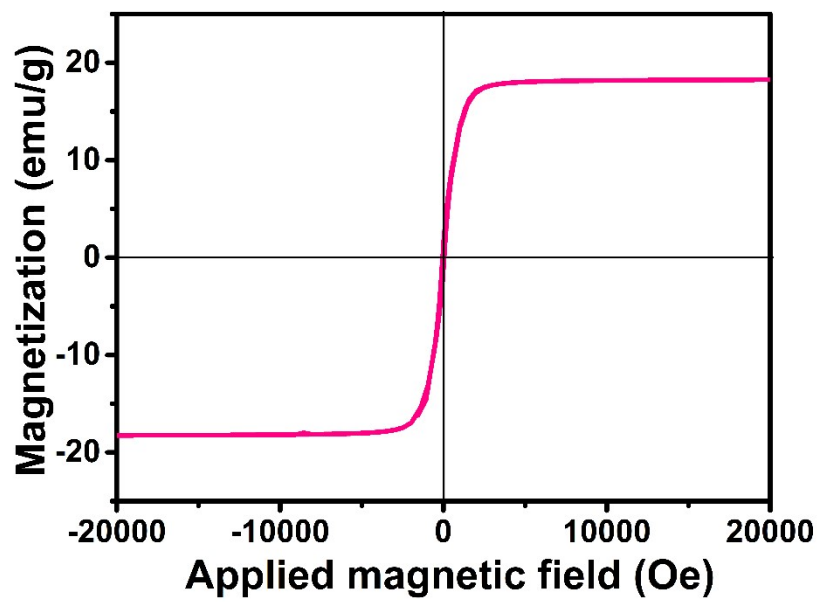

Figure S16. The magnetic hysteresis loop of Ni-BNCNTs@HMPs-NH<sub>2</sub>.

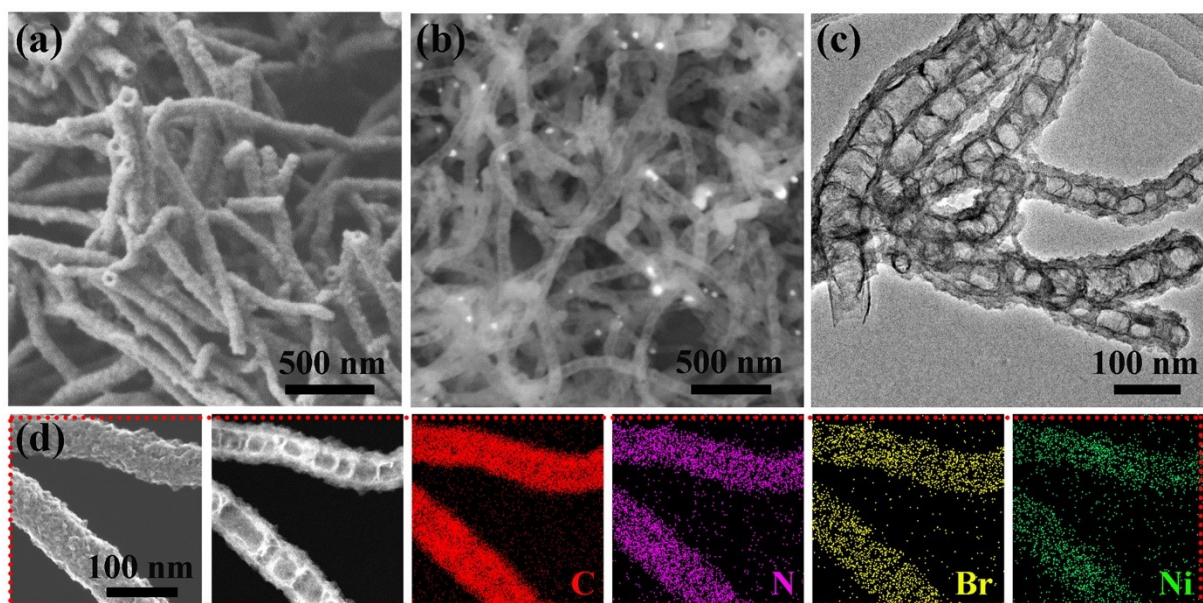

**Figure S17.** (a,b) SEM images and (c) TEM image of Ni-BNCNTs@HMPs-NH<sub>2</sub> after using for 10 times. (d) HAADF-STEM images and corresponding element mappings of Ni-BNCNTs@HMPs-NH<sub>2</sub> after using for 10 times.



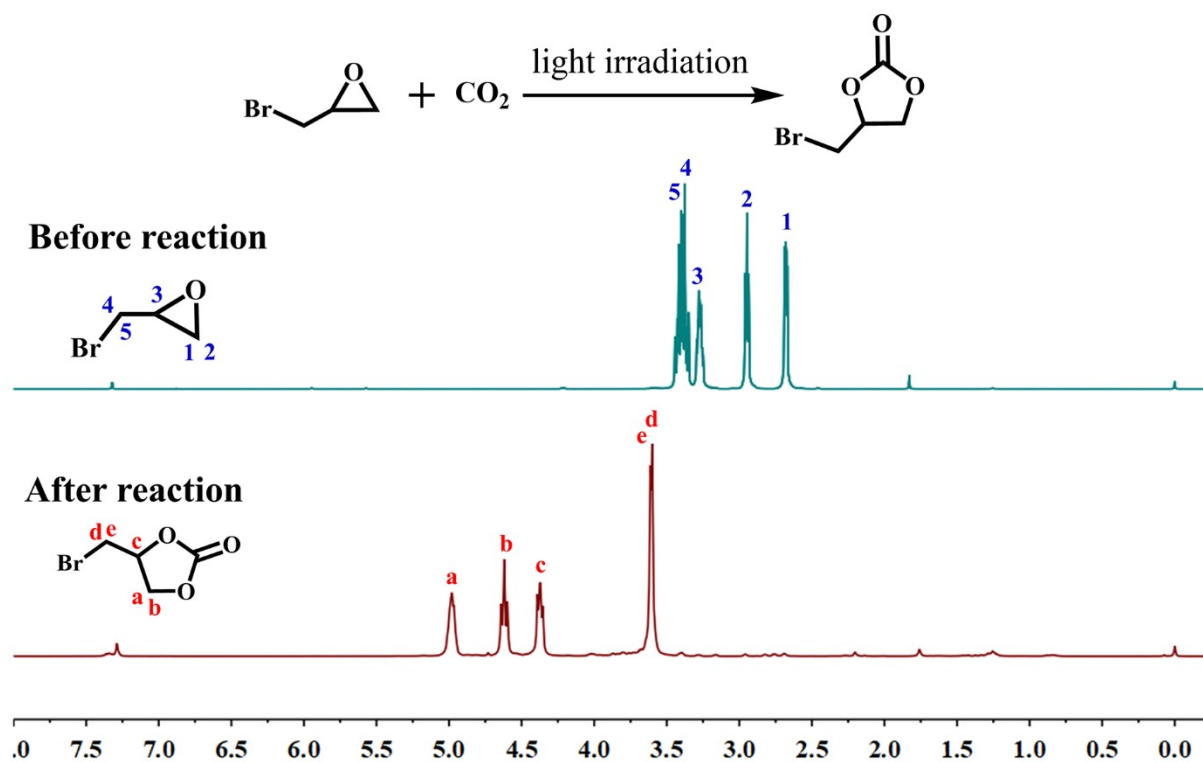

**Figure S18.** Crude <sup>1</sup>H-NMR spectra of cycloaddition of CO<sub>2</sub> with 2-(bromomethyl)oxirane by using Ni-BNCNTs@HMPs-NH<sub>2</sub> (Table 1, Entry 1).

**4-(bromomethyl)-1,3-dioxolan-2-one.** <sup>1</sup>H-NMR (400 MHz, CDCl<sub>3</sub>): δ = 3.70-3.81 (m, 2H), 4.38-4.41 (dd, 1H, J = 4 Hz, J = 8 Hz), 4.56-4.60 (t, 1H, J = 8 Hz), 4.94-5.00 (m, 1H).

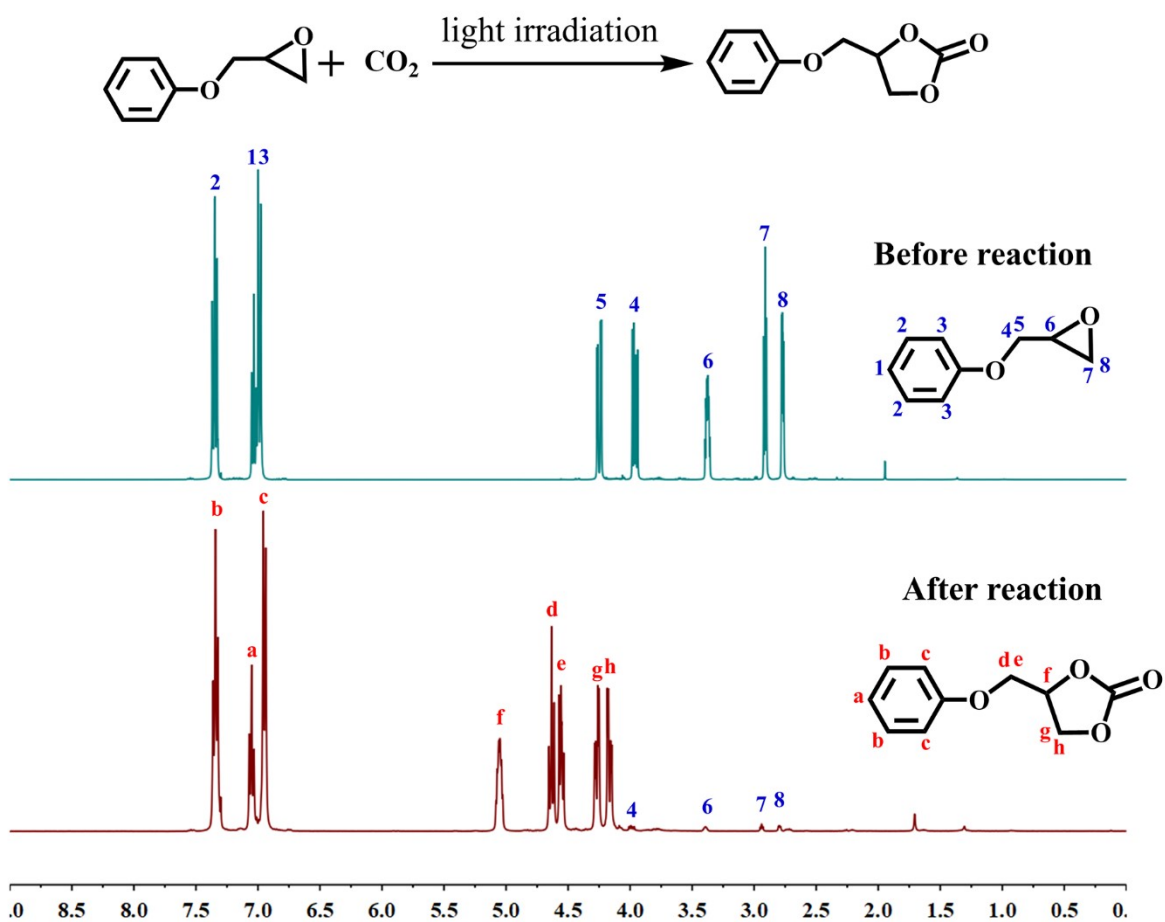

**Figure S19.** Crude  $^1\text{H-NMR}$  spectra of cycloaddition of  $\text{CO}_2$  with 2-(phenoxymethyl)oxirane by using Ni-BNCNTs@HMPs- $\text{NH}_2$  (Table 2, Entry 1).

**4-(phenoxymethyl)-1,3-dioxolan-2-one.**  $^1\text{H-NMR}$  ( $\text{CDCl}_3$ , 400 MHz)  $\delta$  5.81-5.91 (m, 1H), 5.20-5.30 (m, 2H), 4.79-4.84 (m, 1H), 4.37-4.52 (m, 2H), 4.03-4.06 (m, 2H), 3.59-3.70 (m, 2H) ppm.

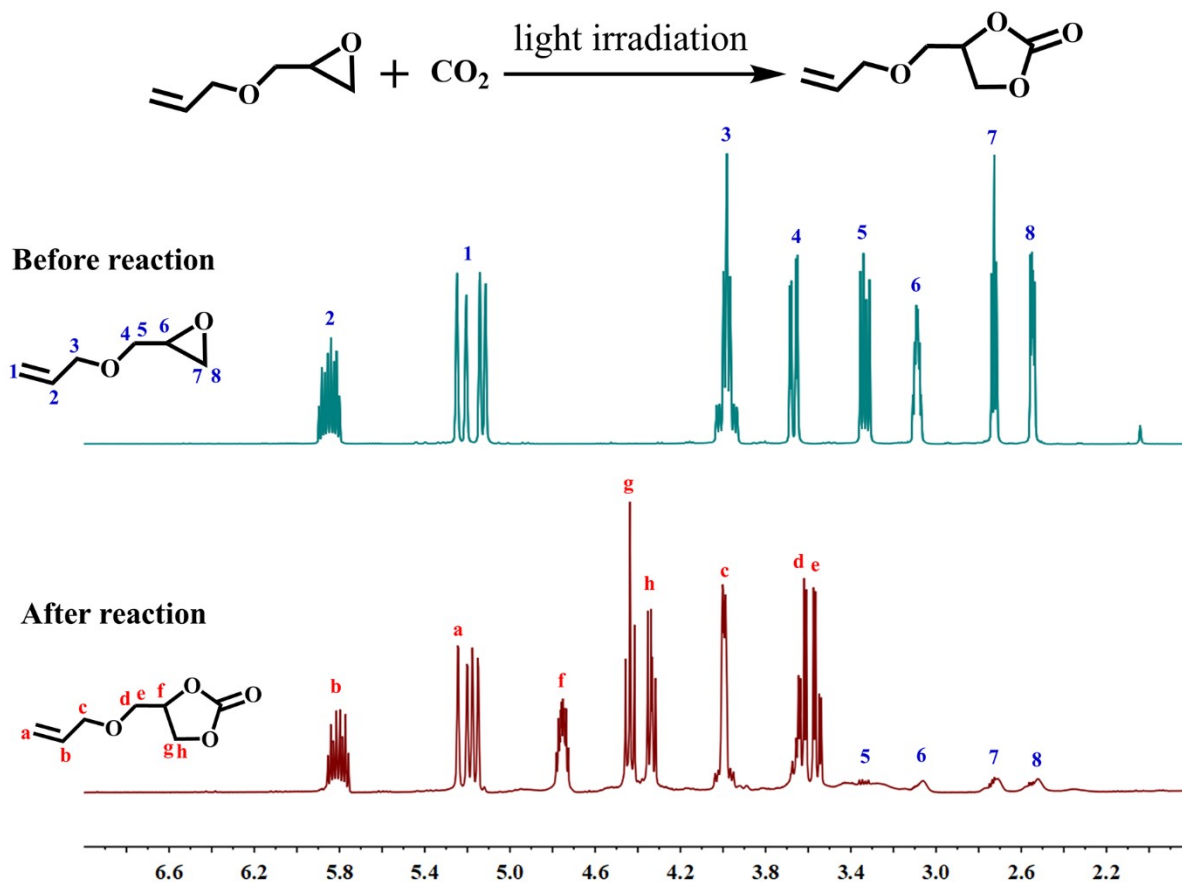

**Figure S20.** Crude <sup>1</sup>H-NMR spectra of cycloaddition of CO<sub>2</sub> with 2-((allyloxy)methyl)oxirane by using Ni-BNCNTs@HMPS-NH<sub>2</sub> (Table 2, Entry 2).

**4-((Allyloxy)methyl)-1,3-dioxolan-2-one.** <sup>1</sup>H-NMR (CDCl<sub>3</sub>, 400 MHz) δ 5.81-5.91 (m, 1H), 5.20-5.30 (m, 2H), 4.79-4.84 (m, 1H), 4.37-4.52 (m, 2H), 4.03-4.06 (m, 2H), 3.59-3.70 (m, 2H) ppm.

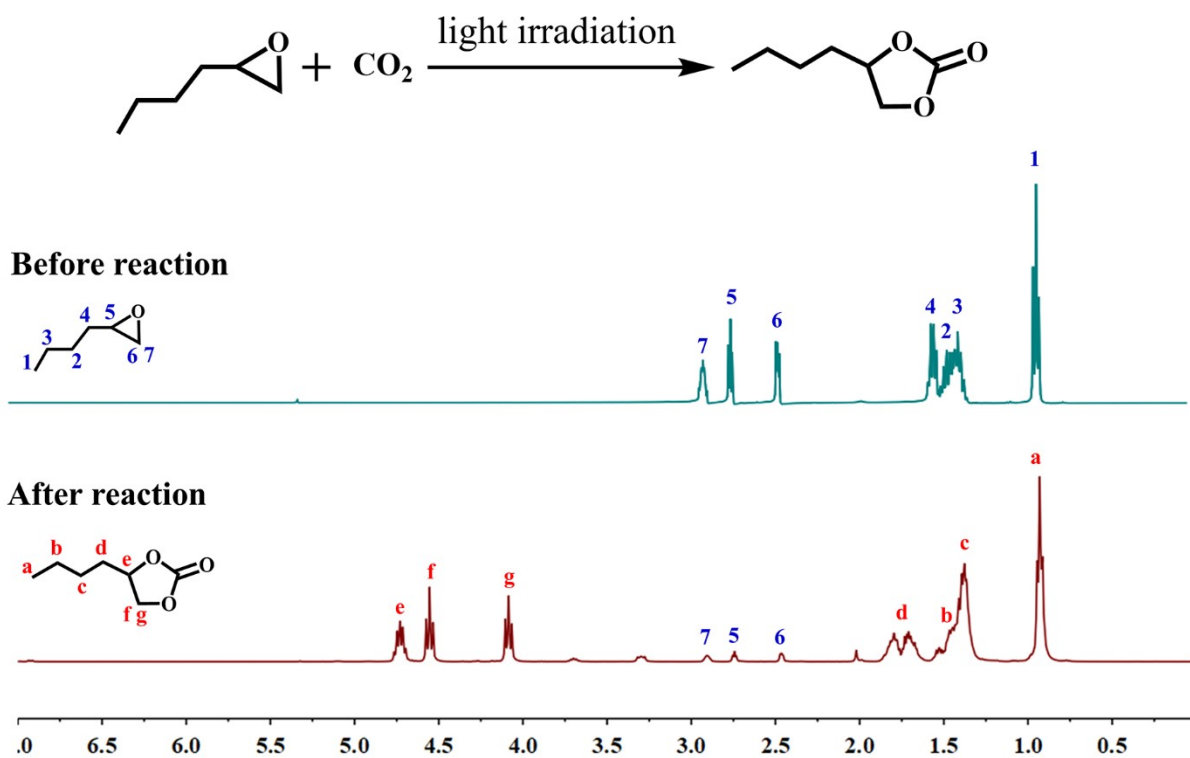

**Figure S21.** Crude <sup>1</sup>H-NMR spectra of cycloaddition of CO<sub>2</sub> with 2-butylloxirane by using Ni-BNCNTs@HMPs-NH<sub>2</sub> (Table 2, Entry 3).

**4-n-Butyl-1,3-dioxolan-2-one.** <sup>1</sup>H-NMR (CDCl<sub>3</sub>, 400 MHz) δ 4.66-4.73 (m, 1H), 4.52 (t, J = 8.0 Hz, 1H), 4.06 (dd, J = 7.3 Hz, J = 8.0 Hz, 1H), 1.63-1.85 (m, 2H), 1.30-1.49 (m, 4H), 0.92 (t, J = 7.0 Hz, 3H) ppm.

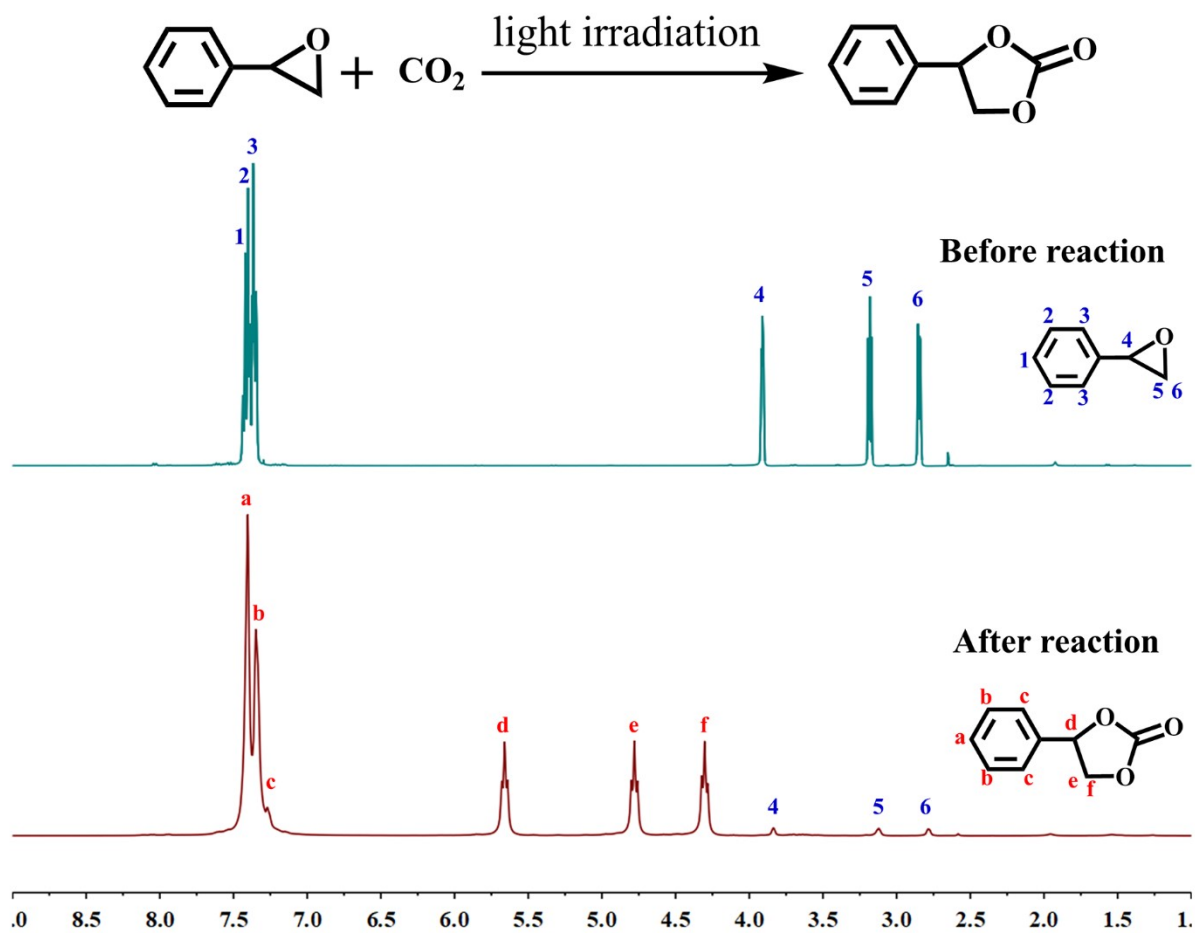

**Figure S22.** Crude  $^1\text{H-NMR}$  spectra of cycloaddition of  $\text{CO}_2$  with 2-phenyloxirane by using Ni-BNCNTs@HMPs- $\text{NH}_2$  (Table 2, Entry 4).

**4-Phenyl-1,3-dioxolan-2-one.**  $^1\text{H-NMR}$  ( $\text{CDCl}_3$ , 400 MHz)  $\delta$  7.44 (d,  $3J = 6.4$  Hz, 3H), 7.36 (d,  $J = 7.6$  Hz, 2H), 5.70 (t,  $J = 8.0$  Hz, 1H), 4.80 (t,  $J = 8.4$  Hz, 1H), 4.35 (t,  $J = 8.4$  Hz, 1H) ppm.

**Table S1.** Structural parameters extracted from the Ni K-edge EXAFS fitting.

| Sample    | Scattering pair | CN  | R(Å) | $\sigma^2(10^{-3}\text{Å}^2)$ | $\Delta E_0(\text{eV})$ | R factor |
|-----------|-----------------|-----|------|-------------------------------|-------------------------|----------|
| Ni-BNCNTs | Ni-N            | 4.0 | 1.88 | 9.8                           | 8.01                    | 0.016    |

CN is the coordination number; R is interatomic distance (the bond length between central atoms and surrounding coordination atoms);  $\sigma^2$  is Debye-Waller factor (a measure of thermal and static disorder in absorber-scatterer distances);  $\Delta E_0$  is edge-energy shift (the difference between the zero kinetic energy value of the sample and that of the theoretical model). R factor is used to value the goodness of the fitting.



**Table S2.** Summary of the previously reported catalysts and our catalyst for the cycloaddition of CO<sub>2</sub> with epoxides.

| No. | Samples                        | Type                     | Epoxide                            | Co-catalyst/Solvent   | CO <sub>2</sub> pressure (MPa) | T (°C)                | Reaction time (h) | Yield (%) | Ref.      |
|-----|--------------------------------|--------------------------|------------------------------------|-----------------------|--------------------------------|-----------------------|-------------------|-----------|-----------|
| 1   | Co-POP                         | porous organic polymers  | epichlorohydrin (8 mmol)           | None/None             | 0.1                            | 100                   | 8                 | >99       | 1         |
| 2   | COP-222                        | covalent organic polymer | epichlorohydrin (5 mmol)           | None/None             | 0.1                            | 100                   | 24                | 99        | 2         |
| 3   | rho-ZMOF                       | zeolite-like MOF         | propylene oxide (34.5 mmol)        | TBAB (0.62 mmol)/None | 1                              | 40                    | 3                 | 99.2      | 3         |
| 4   | Amb-OH-I-910                   | Amberlite resin bead     | propylene oxide (20 mmol)          | None/Water            | 1                              | 80                    | 24                | 95        | 4         |
| 5   | MOF-5-MIX                      | mesoporous nature        | epichlorohydrin (25 mmol)          | TBAB (0.25 mmol)/None | 1.2                            | 50                    | 6                 | 98        | 5         |
| 6   | Phen <sup>+</sup> -PHP-2Br     | porous hybrid polymers   | epichlorohydrin (2 mmol)           | None/None             | 0.1                            | 60                    | 48                | 99        | 6         |
| 7   | polyILs@MIL-101                | MOF                      | 3-bromopropylene oxide (1 mmol)    | None/Acetonitrile     | 0.1                            | 70                    | 24                | 85        | 7         |
| 8   | IHCP-OH(1)                     | microporous structure    | epichlorohydrin (15 mmol)          | None/None             | 3                              | 135                   | 1                 | 99        | 8         |
| 9   | Bi-PCN-224                     | MOF                      | propylene epoxide (4.5 mmol)       | TBAB (0.5 mmol)/None  | 0.1                            | 300 W xenon lamp      | 6                 | 99        | 9         |
| 10  | AuNPs-TBD                      | nanoparticles            | propylene oxide (34.5 mmol)        | TBAB (0.15 mmol)/None | 0.1                            | 780 nm LED            | 24                | 97        | 10        |
| 11  | HPC-800                        | hollow structure         | 3-bromopropylene oxide (0.15 mmol) | TBAB (0.1 mmol)/DMF   | 0.1                            | 0.3 W/cm <sup>2</sup> | 10                | 94        | 11        |
| 12  | PMo <sub>12</sub> @Zr-Fc       | MOF nanosheets           | styrene oxide (12.5 mmol)          | TBAB (0.25 mmol)/None | 0.1                            | 0.4 W/cm <sup>2</sup> | 8                 | 87        | 12        |
| 13  | Ni-BNCNTs@HMPs-NH <sub>2</sub> | hierarchical porous      | 3-bromopropylene oxide (10 mmol)   | None/None             | 0.1                            | 0.4 W/cm <sup>2</sup> | 12                | 99        | This work |

## References

- (1) Chakraborty, J.; Nath, I.; Song, S.; Kao, C.-M.; Verpoort, F. Synergistic Performance of a Sub-nanosopic Cobalt and Imidazole Grafted Porous Organic Polymer for CO<sub>2</sub> Fixation to Cyclic Carbonates under Ambient Pressure without a Co-catalyst. *Journal of Materials Chemistry A* **2020**, *8* (28), 13916-13920, DOI: 10.1039/d0ta02821e.
- (2) Subramanian, S.; Oppenheim, J.; Kim, D.; Nguyen, T. S.; Silo, W. M. H.; Kim, B.; Goddard, W. A.; Yavuz, C. T. Catalytic Non-redox Carbon Dioxide Fixation in Cyclic Carbonates. *Chem* **2019**, *5* (12), 3232-3242, DOI: 10.1016/j.chempr.2019.10.009.
- (3) Zhang, S.; Jang, M.-S.; Lee, J.; Puthiaraj, P.; Ahn, W.-S. Zeolite-Like Metal Organic Framework (ZMOF) with a rho Topology for a CO<sub>2</sub> Cycloaddition to Epoxides. *ACS Sustainable Chemistry & Engineering* **2020**, *8* (18), 7078-7086, DOI: 10.1021/acssuschemeng.0c00885.
- (4) Alassmy, Y. A.; Asgar Pour, Z.; Pescarmona, P. P. Efficient and Easily Reusable Metal-Free Heterogeneous Catalyst Beads for the Conversion of CO<sub>2</sub> into Cyclic Carbonates in the Presence of Water as Hydrogen-Bond Donor. *ACS Sustainable Chemistry & Engineering* **2020**, *8* (21), 7993-8003, DOI: 10.1021/acssuschemeng.0c02265.
- (5) Kurisingal, J. F.; Rachuri, Y.; Gu, Y.; Choe, Y.; Park, D.-W. Multi-variate Metal Organic Framework as Efficient Catalyst for the Cycloaddition of CO<sub>2</sub> and Epoxides in a Gas-Liquid-Solid Reactor. *Chemical Engineering Journal* **2020**, *386*, 121700, DOI: 10.1016/j.cej.2019.05.061.
- (6) Chen, G.; Zhang, Y.; Liu, K.; Liu, X.; Wu, L.; Zhong, H.; Dang, X.; Tong, M.; Long, Z. In Situ Construction of Phenanthroline-based Cationic Radical Porous Hybrid Polymers for Metal-free Heterogeneous Catalysis. *Journal of Materials Chemistry A* **2021**, *9* (12), 7556-7565, DOI: 10.1039/d0ta12018a.

- (7) Ding, M.; Jiang, H.-L. Incorporation of Imidazolium-Based Poly(ionic liquid)s into a Metal-Organic Framework for CO<sub>2</sub> Capture and Conversion. *ACS Catalysis* **2018**, *8* (4), 3194-3201, DOI: 10.1021/acscatal.7b03404.
- (8) Jia, D.; Ma, L.; Wang, Y.; Zhang, W.; Li, J.; Zhou, Y.; Wang, J. Efficient CO<sub>2</sub> Enrichment and Fixation by Engineering Micropores of Multifunctional Hypercrosslinked Ionic Polymers. *Chemical Engineering Journal* **2020**, *390*, 124652, DOI: 10.1016/j.cej.2020.124652.
- (9) Zhai, G.; Liu, Y.; Lei, L.; Wang, J.; Wang, Z.; Zheng, Z.; Wang, P.; Cheng, H.; Dai, Y.; Huang, B. Light-Promoted CO<sub>2</sub> Conversion from Epoxides to Cyclic Carbonates at Ambient Conditions over a Bi-Based Metal-Organic Framework. *ACS Catalysis* **2021**, *11* (4), 1988-1994, DOI: 10.1021/acscatal.0c05145.
- (10) Guselnikova, O.; Postnikov, P.; Kosina, J.; Kolska, Z.; Trelin, A.; Svorcik, V.; Lyutakov, O. A Breath of Fresh Air for Atmospheric CO<sub>2</sub> Utilisation: a Plasmon-assisted Preparation of Cyclic Carbonate at Ambient Conditions. *Journal of Materials Chemistry A* **2021**, *9* (13), 8462-8469, DOI: 10.1039/d0ta12530j.
- (11) Yang, Q.; Yang, C. C.; Lin, C. H.; Jiang, H. L. Metal-Organic-Framework-Derived Hollow N-Doped Porous Carbon with Ultrahigh Concentrations of Single Zn Atoms for Efficient Carbon Dioxide Conversion. *Angewandte Chemie International Edition* **2019**, *58* (11), 3511-3515, DOI: 10.1002/anie.201813494.
- (12) Fang, Z.; Deng, Z.; Wan, X.; Li, Z.; Ma, X.; Hussain, S.; Ye, Z.; Peng, X. Keggin-type Polyoxometalates Molecularly Loaded in Zr-ferrocene Metal Organic Framework Nanosheets for Solar-driven CO<sub>2</sub> Cycloaddition. *Applied Catalysis B: Environmental* **2021**, *296*, 120329, DOI: 10.1016/j.apcatb.2021.120329.
